# Supplementary material for: Quantitative dot blot analysis (QDB), a versatile high throughput immunoblot method
Source: PubMed Central journal article supplement (PMC5601674; doi:10.18632/oncotarget.17236), 2017-04-19
Supplement: oncotarget-08-58553-s002.pdf [file oncotarget-08-58553-s002.pdf]

| Assigned mouse # | Experiment | 1           | 2          | 3           | 4          | 5           | 6          | 7           | 8           | 9           | 10          | Inter-plate CV |  |
|------------------|------------|-------------|------------|-------------|------------|-------------|------------|-------------|-------------|-------------|-------------|----------------|--|
| blank            |            | 257923.00   | 204723.0   | 101611.00   | 76883.00   | 71662.00    | 63832.00   | 175870.00   | 268015.00   | 120922.00   | 129553.00   |                |  |
|                  |            | 273368.00   | 180347.0   | 121251.00   | 81944.00   | 79463.00    | 64481.00   |             | 250070.00   | 111822.00   | 101549.00   |                |  |
|                  |            | 266133.00   | 205961.0   | 108192.00   |            |             |            | 45037.00    | 165724.00   | 201396.00   | 114723.00   | 131913.00      |  |
|                  | average    | 265808.00   | 197010.3   | 110351.33   | 79413.50   | 75562.50    | 57783.33   | 170797.00   | 239827.00   | 115822.33   | 121005.00   |                |  |
| stdev            | 7727.63    | 14444.1     | 9996.47    | 3578.67     | 5516.14    | 11043.42    | 7174.31    | 34470.45    | 4648.54     | 16890.66    |             |                |  |
| %CV              | 2.91       | 7.3         | 9.06       | 4.51        | 7.30       | 19.11       | 4.20       | 14.37       | 4.01        | 13.96       |             | 8.68           |  |
| 83               |            | 4992204.00  | 5265429.0  | 4737686.00  | 3514563.00 | 4145321.00  | 3009564.00 | 3921988.00  | 4834340.00  | 5059482.00  | 5650137.00  |                |  |
|                  |            | 5447068.00  | 5277402.0  | 5001807.00  | 4040884.00 | 4254870.00  | 2997768.00 | 4642965.00  | 4585008.00  | 4444240.00  | 5108010.00  |                |  |
|                  |            | 4807332.00  | 4099196.0  | 4886265.00  | 3224871.00 |             | 3075140.00 | 4581605.00  |             |             | 4464380.00  |                |  |
|                  | average    | 5082201.33  | 4880675.6  | 4875252.67  | 3593439.33 | 4200095.50  | 3027490.67 | 4382186.00  | 4709674.00  | 4751861.00  | 5074175.67  |                |  |
| stdev            | 329226.64  | 676807.7    | 132404.42  | 413685.16   | 77462.84   | 41684.90    | 399722.29  | 176304.35   | 435041.79   | 593602.13   |             |                |  |
| %CV              | 6.48       | 13.8        | 2.72       | 11.51       | 1.84       | 1.38        | 9.12       | 3.74        | 9.16        | 11.70       |             | 7.15           |  |
| 84               |            | 9352025.00  | 11141365.0 | 10585928.00 | 8026155.00 | 8063921.00  | 6624539.00 | 10848321.00 | 9593500.00  | 9949815.00  | 10110061.00 |                |  |
|                  |            | 10460581.00 | 10259501.0 | 10089027.00 | 6950462.00 | 7060666.00  | 5511988.00 | 10707858.00 | 9713867.00  | 10162348.00 | 11712526.00 |                |  |
|                  |            |             | 10778940.0 | 8579763.00  |            | 7227813.00  | 6606523.00 | 9577128.00  | 9264168.00  | 9831606.00  | 12113207.00 |                |  |
|                  | average    | 9906303.00  | 10726602.0 | 9751572.67  | 7488308.50 | 7450800.00  | 6247683.33 | 10377769.00 | 9523845.00  | 9981256.33  | 11311931.33 |                |  |
| stdev            | 783867.46  | 443255.5    | 1044787.57 | 760629.81   | 537515.16  | 637194.52   | 696923.22  | 232800.69   | 167597.69   | 1059955.44  |             |                |  |
| %CV              | 7.91       | 4.1         | 10.71      | 10.16       | 7.21       | 10.20       |            | 2.44        | 1.68        | 9.37        |             | 7.09           |  |
| 85               |            | 6921935.00  | 7291694.0  | 7208681.00  | 5300625.00 | 4688162.00  | 4343827.00 | 6317790.00  | 6801831.00  | 6360800.00  | 7471324.00  |                |  |
|                  |            | 6354484.00  | 6270059.0  | 7070935.00  | 5002961.00 | 5296768.00  | 3618828.00 | 6223924.00  | 6257508.00  | 5832360.00  | 7460264.00  |                |  |
|                  |            | 6016568.00  | 5312430.0  | 7173791.00  | 5037291.00 | 5458477.00  | 4145393.00 | 5640935.00  | 5463434.00  | 5978355.00  |             |                |  |
|                  | average    | 6430995.67  | 6291394.3  | 7151135.67  | 5113625.67 | 5177802.33  | 4036016.00 | 6060883.00  | 6174257.67  | 6057171.67  | 7465794.00  |                |  |
| stdev            | 457507.24  | 989804.4    | 71613.11   | 162853.31   | 442323.52  | 374671.03   | 366701.44  | 673071.02   | 272894.23   | 7820.60     |             |                |  |
| %CV              | 7.11       | 15.7        | 1.00       | 3.18        | 8.54       | 9.28        | 6.05       | 10.90       | 4.51        | 0.10        |             | 6.64           |  |
| 86               |            | 11496452.00 |            | 13046830.00 | 8788833.00 | 10528691.00 | 7996112.00 | 12977436.00 | 11491188.00 | 11602874.00 | 13572050.00 |                |  |
|                  |            | 11242174.00 | 13053215.0 | 12805279.00 | 8477063.00 | 10623064.00 | 7764398.00 | 11599689.00 | 11610982.00 |             | 12461320.00 |                |  |
|                  |            | 10370962.00 | 12400717.0 | 12798948.00 | 7812246.00 | 9444800.00  |            | 12364316.00 | 12381634.00 | 12493640.00 | 12986196.00 |                |  |
|                  | average    | 11036529.33 | 12726966.0 | 12883685.67 | 8359380.67 | 10198851.67 | 7880255.00 | 12313813.67 | 11827934.67 | 12048257.00 | 13006522.00 |                |  |
| stdev            | 590253.53  | 461385.7    | 141322.59  | 498815.99   | 654730.48  | 163846.54   | 690260.50  | 483244.10   | 629866.68   | 555643.90   |             |                |  |
| %CV              | 5.35       | 3.6         | 1.10       | 5.97        | 6.42       | 2.08        | 5.61       | 4.09        | 5.23        | 4.27        |             | 4.37           |  |
| 87               |            | 5653344.00  | 5428436.0  | 5837550.00  | 3611708.00 | 4331900.00  | 3404892.00 | 5577983.00  | 5276137.00  | 5176022.00  | 6659764.00  |                |  |
|                  |            | 5747982.00  | 5187147.0  | 5546210.00  | 4003733.00 | 4230046.00  | 3325398.00 | 5328506.00  | 5497367.00  | 5465650.00  | 6303515.00  |                |  |
|                  |            | 4962280.00  |            | 5498592.00  | 3949731.00 |             | 3707959.00 | 4934722.00  | 4780849.00  | 5584030.00  | 6246835.00  |                |  |
|                  | average    | 5454535.33  | 5307791.5  | 5627450.67  | 3855057.33 | 4280973.00  | 3479416.33 | 5280403.67  | 5184784.33  | 5408567.33  | 6403371.33  |                |  |
| stdev            | 428923.74  | 170617.0    | 183502.50  | 212469.36   | 72021.65   | 201875.30   | 324317.06  | 366890.30   | 209908.21   | 223843.82   |             |                |  |
| %CV              | 7.86       | 3.2         | 3.26       | 5.51        | 1.68       | 5.80        | 6.14       | 7.08        | 3.88        | 3.50        |             | 4.79           |  |
| 88               |            | 4381043.00  |            | 4055386.00  | 2675349.00 | 3827788.00  | 2692040.00 | 5499243.00  | 5035632.00  | 4403539.00  | 5151930.00  |                |  |
|                  |            | 4806735.00  | 4435202.0  | 4286525.00  | 3124200.00 | 3927183.00  | 3035641.00 | 4966158.00  | 4613121.00  | 3827837.00  | 5341939.00  |                |  |
|                  |            | 4353950.00  | 4559729.0  | 3657597.00  |            | 4233011.00  | 2862757.00 | 5304366.00  | 4716800.00  | 3255295.00  |             |                |  |
|                  | average    | 4513909.33  | 4497465.5  | 3999836.00  | 2899774.50 | 3995994.00  | 2863479.33 | 5256589.00  | 4788517.67  | 3828890.33  | 5246934.50  |                |  |
| stdev            | 253956.02  | 88053.8     | 318122.55  | 317385.59   | 211193.36  | 171801.64   | 269734.84  | 220196.40   | 574122.72   | 134356.65   |             |                |  |
| %CV              | 5.63       | 1.9         | 7.95       | 10.95       | 5.29       | 6.00        | 5.13       | 4.60        | 14.99       | 2.56        |             | 6.51           |  |
| 89               |            | 8748742.00  | 9336499.0  | 11327895.00 | 6479851.00 | 6826095.00  | 6976274.00 | 9131935.00  | 7704992.00  | 8858538.00  | 9758482.00  |                |  |
|                  |            | 9042091.00  | 9835071.0  | 10690956.00 | 6054366.00 | 8313501.00  | 6118803.00 | 9898596.00  | 8341177.00  | 7640989.00  | 10661228.00 |                |  |
|                  |            | 8125953.00  | 8204143.0  | 9728878.00  | 7136080.00 | 7409280.00  | 5339339.00 | 8484868.00  | 8162023.00  | 8691494.00  | 10352047.00 |                |  |
|                  | average    | 8638928.67  | 9125237.6  | 10582576.33 | 6556765.67 | 7516292.00  | 6144805.33 | 9171799.67  | 8069397.33  | 8397007.00  | 10257252.33 |                |  |
| stdev            | 467836.97  | 835736.2    | 804999.04  | 544943.29   | 749455.02  | 818777.22   | 707706.58  | 328051.02   | 660036.62   | 458777.84   |             |                |  |
| %CV              | 5.42       | 9.1         | 7.61       | 8.31        | 9.97       | 13.32       | 7.72       | 4.07        | 7.86        | 4.47        |             | 7.79           |  |
| 90               |            | 11146284.00 | 12383479.0 | 14248959.00 | 9253049.00 | 11139971.00 | 6927604.00 | 13865610.00 | 13036882.00 | 13057173.00 | 11180771.00 |                |  |
|                  |            | 11349525.00 | 11846242.0 | 12869377.00 | 8616935.00 | 12598864.00 | 9077586.00 | 14429219.00 | 12958677.00 | 12025374.00 | 13207785.00 |                |  |
|                  |            | 12855211.00 | 10113107.0 | 12771333.00 |            | 8604518.00  |            | 12064310.00 | 10429314.00 | 10059617.00 | 12577823.00 |                |  |
|                  | average    | 11783673.33 | 11447609.3 | 13296556.33 | 8934992.00 | 10781117.67 | 8002595.00 | 13453046.33 | 12141624.33 | 11714054.67 | 12322126.33 |                |  |
| stdev            | 933526.35  | 1186519.3   | 826260.42  | 449800.52   | 2021208.00 | 1520266.85  | 1235255.13 | 1483419.70  | 1522834.62  | 1037416.03  |             |                |  |
| %CV              | 7.92       | 10.3        | 6.21       | 5.03        | 18.75      | 19.00       | 9.18       | 12.22       | 13.00       | 8.42        |             | 11.01          |  |
| 91               |            | 9331017.00  | 7664136.0  | 10412341.00 | 6238772.00 | 7828728.00  | 5271917.00 | 9153408.00  | 8648790.00  | 8108337.00  | 9716124.00  |                |  |
|                  |            | 8971237.00  | 8778273.0  | 11431708.00 | 5982607.00 | 7989412.00  | 5238024.00 | 10513581.00 | 9332853.00  | 8565278.00  | 10381208.00 |                |  |
|                  |            | 7553300.00  | 7213359.0  | 8613320.00  | 5927131.00 | 7035269.00  | 6203650.00 | 9143733.00  | 7217959.00  |             | 10855472.00 |                |  |
|                  | average    | 8618518.00  | 7885256.0  | 10152456.33 | 6049503.33 | 7617803.00  | 5571197.00 | 9603574.00  | 8399867.33  | 8336807.50  | 10317601.33 |                |  |
| stdev            | 939881.62  | 805549.1    | 1427053.87 | 166241.90   | 510846.58  | 547982.46   | 788104.03  | 1079196.94  | 323106.08   | 572331.04   |             |                |  |
| %CV              | 10.91      | 10.2        | 14.06      | 2.75        | 6.71       | 9.84        | 8.21       | 12.85       | 3.88        | 5.55        |             | 8.49           |  |
| 92               |            | 7379319.00  | 7786006.0  | 7133101.00  | 5385934.00 | 7356026.00  | 5271995.00 | 8480860.00  | 8874315.00  | 8011840.00  | 8656388.00  |                |  |
|                  |            | 6871388.00  | 6346237.0  | 8384356.00  | 5317302.00 | 7814914.00  | 5283543.00 | 8101480.00  | 7050423.00  | 7000206.00  | 7447713.00  |                |  |
|                  |            | 8242889.00  | 7329022.0  | 7510075.00  | 5246169.00 | 7451557.00  | 5353100.00 | 9692217.00  | 7183931.00  | 6795589.00  | 8259304.00  |                |  |

|                      |         |             |            |             |             |             |             |             |             |             |             |       |
|----------------------|---------|-------------|------------|-------------|-------------|-------------|-------------|-------------|-------------|-------------|-------------|-------|
|                      | average | 7497865.33  | 7153755.0  | 7675844.00  | 5316468.33  | 7540832.33  | 5302879.33  | 8758185.67  | 7702889.67  | 7269211.67  | 8121135.00  |       |
|                      | stdev   | 693392.87   | 735712.3   | 641887.29   | 69886.23    | 242120.04   | 43873.97    | 830838.85   | 1016677.96  | 651221.67   | 616069.65   |       |
|                      | %CV     | 9.25        | 10.2       | 8.36        | 1.31        | 3.21        | 0.83        | 9.49        | 13.20       | 8.96        | 7.59        | 7.25  |
| 93                   |         | 9397191.00  | 8534946.0  | 9632597.00  | 6496924.00  |             | 6299626.00  | 6379096.00  | 8217390.00  | 8107002.00  | 10104783.00 |       |
|                      |         | 10040737.00 | 8643472.0  | 10465941.00 | 6906026.00  | 7450459.00  | 5998831.00  | 9371880.00  | 7286649.00  | 6563313.00  | 10955497.00 |       |
|                      |         | 7898586.00  | 7084078.0  | 9513505.00  | 5487646.00  | 8317192.00  | 6016125.00  | 9399736.00  | 7578588.00  | 8633963.00  | 10584588.00 |       |
|                      | average | 9112171.33  | 8087498.6  | 9870681.00  | 6296865.33  | 7883825.50  | 6104860.67  | 8383570.67  | 7694209.00  | 7768092.67  | 10548289.33 |       |
|                      | stdev   | 1099149.62  | 870680.3   | 518937.93   | 730046.61   | 612872.78   | 168893.23   | 1735981.86  | 476020.87   | 1076123.83  | 426517.02   |       |
|                      | %CV     | 12.06       | 10.7       | 5.26        | 11.59       | 7.77        | 2.77        | 20.71       | 6.19        | 13.85       | 4.04        | 9.50  |
| 94                   |         | 16583479.00 | 17925146.0 | 20867556.00 | 10431889.00 | 18389824.00 | 13345207.00 | 18556128.00 | 17850038.00 | 16676455.00 | 17338972.00 |       |
|                      |         | 17330760.00 | 14174062.0 | 21099228.00 | 13849096.00 | 15358490.00 | 12553013.00 | 17897672.00 | 16457481.00 | 16147852.00 | 17797916.00 |       |
|                      |         | 10224384.00 | 15846225.0 | 15503840.00 | 9916920.00  | 18510576.00 | 11997451.00 | 21072708.00 | 14789130.00 | 16237366.00 | 17640216.00 |       |
|                      | average | 14712874.33 | 15981811.0 | 19156874.67 | 11399301.67 | 17419630.00 | 12631890.33 | 19175502.67 | 16365549.67 | 16353891.00 | 17592368.00 |       |
|                      | stdev   | 3905062.91  | 1879214.0  | 3165740.78  | 2137151.72  | 1786020.39  | 677331.37   | 1675688.56  | 1532523.40  | 282911.36   | 233183.34   |       |
|                      | %CV     | 26.54       | 11.7       | 16.53       | 18.75       | 10.25       | 5.36        | 8.74        | 9.36        | 1.73        | 1.33        | 11.03 |
| 95                   |         | 11673902.00 | 9790503.0  | 12295580.00 | 6794674.00  | 9175328.00  | 6792898.00  | 11228940.00 | 7428758.00  | 9775306.00  | 11806924.00 |       |
|                      |         | 9678571.00  | 10089710.0 | 11511060.00 | 7471402.00  | 9081886.00  | 7330957.00  | 10972328.00 | 7649987.00  | 8232731.00  | 10868093.00 |       |
|                      |         | 10563695.00 | 9096960.0  | 12143638.00 | 6947876.00  | 8506920.00  | 6798697.00  | 9743707.00  | 9307125.00  | 7543860.00  | 10795686.00 |       |
|                      | average | 10638722.67 | 9659057.6  | 11983426.00 | 7071317.33  | 8921378.00  | 6974184.00  | 10648325.00 | 8128623.33  | 8517299.00  | 11156901.00 |       |
|                      | stdev   | 999779.13   | 509260.7   | 416075.50   | 354849.99   | 361959.15   | 308988.09   | 793859.39   | 1026589.11  | 1142616.31  | 564099.39   |       |
|                      | %CV     | 9.40        | 5.2        | 3.47        | 5.02        | 4.06        | 4.43        | 7.46        | 12.63       | 13.42       | 5.06        | 7.02  |
| 96                   |         | 2483478.00  | 2362862.0  | 3174477.00  | 1698955.00  | 1946718.00  | 1560927.00  | 2237978.00  | 2266585.00  | 2099497.00  | 2378985.00  |       |
|                      |         | 2520295.00  | 2031147.0  | 2304654.00  | 1421040.00  | 1815193.00  | 1409855.00  | 2284871.00  | 2115447.00  | 1960800.00  | 2608093.00  |       |
|                      |         | 2308750.00  | 1878963.0  | 1929951.00  | 1356590.00  |             | 1457940.00  | 2301700.00  | 2178156.00  | 2444008.00  | 2543518.00  |       |
|                      | average | 2437507.67  | 2090990.6  | 2469694.00  | 1492195.00  | 1880955.50  | 1476240.67  | 2274849.67  | 2186729.33  | 2168101.67  | 2510198.67  |       |
|                      | stdev   | 113016.70   | 247437.8   | 638466.83   | 181936.04   | 93002.22    | 77180.78    | 33021.87    | 75932.87    | 248802.02   | 118132.35   |       |
|                      | %CV     | 4.64        | 11.8       | 25.85       | 12.19       | 4.94        | 5.23        | 1.45        | 3.47        | 11.48       | 4.71        |       |
| intra assay CV(n=15) |         | 9.03        | 8.7        | 8.15        | 8.02        | 6.90        | 6.82        | 8.08        | 7.63        | 8.12        | 5.19        |       |

Supplemental table 1: Intra-plate and Inter-plate CV% of Zestern plate.

Mouse livers were collected from 15 individual mice, indicated by the assigned number. Total liver lysates were prepared from these mouse livers and used to measure tubulin content using QDB analysis. Each sample was measured in triplicate, and the experiment was repeated 10 times in 2 weeks. The intra and inter plate CV% were calculated by following the method introduced at the following website: [https://www.salimetrics.com/assets/documents/Spit\\_Tips\\_-\\_Inter\\_Intra\\_Assay\\_Coefficients\\_of\\_Variability.pdf](https://www.salimetrics.com/assets/documents/Spit_Tips_-_Inter_Intra_Assay_Coefficients_of_Variability.pdf).

For 15 samples in 10 repeats, the interplate CV% is ranging from 4.37% to 11.03%. For 15 samples in each experiment, the intra-plate CV% is ranging from 5.19% to 9.03%.
